# Supplementary material
Source: PubMed Central journal article supplement (PMC6080423)
Supplement: awx203_supp.pdf [file awx203_supp.pdf]

## Supplementary Material

### Appendix

| <b>Table/Figure</b> | <b>Content</b>                                                                                                                                          | <b>Page numbers</b> |
|---------------------|---------------------------------------------------------------------------------------------------------------------------------------------------------|---------------------|
| <b>Table 1</b>      | Primer pairs used for site-directed mutagenesis                                                                                                         | 2                   |
| <b>Table 2</b>      | Clinical and neuroimaging data of <i>AKT3</i> mutation-positive patients (N=13; this series)                                                            | 3-5                 |
| <b>Table 3</b>      | Summary of the neuroimaging features of <i>AKT3</i> mutation positive patients identified to date (N=22)                                                | 6-8                 |
| <b>Table 4</b>      | Additional pertinent medical issues in patients with <i>AKT3</i> mutations                                                                              | 9-10                |
| <b>Table 5</b>      | Molecular finding, levels of mosaicism and detection method of <i>AKT3</i> mutation positive patients identified to date (N=22)                         | 11-12               |
| <b>Table 6</b>      | Fisher's exact test comparing the association between segmental cortical malformations and the type of <i>AKT3</i> mutation (mosaic vs. constitutional) | 13                  |
| <b>Figure</b>       | Proposed molecular diagnostic workflow for individuals with megalencephaly                                                                              | 14                  |
| <b>Text</b>         | Supplementary Text – Cohort tested and additional pertinent medical information                                                                         | 15-17               |
| <b>References</b>   | Supplementary references                                                                                                                                | 18                  |

**Supplementary Table 1. Primer pairs used for site-directed mutagenesis**

| <b>AKT3 mutation</b> | <b>Forward Primer</b>                                  | <b>Reverse Primer</b>                            |
|----------------------|--------------------------------------------------------|--------------------------------------------------|
| E17K                 | 5'<br>GGTTGGGTTTCAGAAGAGGGGAAAATATATAAAAACTGGAGG<br>3' | 5' CCTCCAGTTTTTTATATATTTTCCCCTCTTCTGAACCCAACC 3' |
| N53K                 | 5' CTTATCCCCTCAACAAGTTTTTCAGTGGCAAATG 3'               | 5' CATTTTGCCACTGAAAACCTGTTGAGGGGATAAG 3'         |
| F54Y                 | 5' CTTATCCCCTCAACAACACTATTCAGTGGCAAATGCC 3'            | 5' GGCATTTTGCCACTGAATAGTTGTTGAGGGGATAAG 3'       |
| V183D                | 5' GAAGAAAGAAGACATTATTGCAAAGG 3'                       | 3' CCTTTGCAATAATGTCTCTTCTTTCTTC5'                |
| N229S                | 5' GATGGAATATGTTAGTGGGGGCGAGCTG 3'                     | 5' CAGCTCGCCCCACTAACATATTCCATC 3'                |
| V268A                | 5' CATTCCGAAAGATTGCGTACCGTGATCTCAAG 3'                 | 5' CTTGAGATCACGGTACGCAATCTTCCGGAATG 3'           |
| D322N                | 5' GGTGTTAGAAGATAATAACTATGGCCGAGCAG 3'                 | Rev: 5' CTGCTCGGCCATAGTTATTATCTTCTAACACC 3'      |
| R465W                | 5' GACAATGAGAGGTGGCCGATTTCCC 3'                        | 5' GGGAAATGCGGCCACCTCTCATTGTC 3'                 |
| K177M (kinase dead)  | 5' GAAAATACTATGCTATGATGATTCTGAAGAAAGAAG 3'             | 5' CTTCTTTCTTCAGAATCATCATAGCATAGTATTTTC 3'       |

**Supplementary Table 2. Clinical and neuroimaging data of AKT3 mutation-positive patients (N=14; this series)**

| <b>DB#</b>                         | <b>LR15-262</b> | <b>LR16-251</b> | <b>LR16-372</b> | <b>LR16-301</b> | <b>LR17-245</b> | <b>LP96-103</b>   | <b>LR13-041</b>  | <b>LR14-271</b> | <b>LR14-254</b> | <b>LR12-412</b> | <b>LR14-025</b>             | <b>LR12-470</b>          | <b>LR13-008</b> | <b>LR14-112</b> |
|------------------------------------|-----------------|-----------------|-----------------|-----------------|-----------------|-------------------|------------------|-----------------|-----------------|-----------------|-----------------------------|--------------------------|-----------------|-----------------|
| <b>Gender</b>                      | M               | M               | F               | F               | M               | F                 | F                | F               | F               | M               | M                           | F                        | M               | M               |
| <b>Ethnicity</b>                   | Caucasian       | Caucasian       | Hispanic        | Caucasian       | Caucasian       | Caucasian         | Caucasian        | Hispanic        | Caucasian       | Middle Eastern  | Caucasian                   | Hispanic                 | Caucasian       | Caucasian       |
| <b>Age last assessed</b>           | 2.5m            | 10m             | 8y              | 21m             | 30m             | Neonatal period   | 3y               | 9m              | 8y10m           | 6y              | 26m                         | 6y                       | 6y10m           | 8y8m            |
| <b>Diagnosis</b>                   | DMEG/HMEG       | DMEG/Multifocal | MEG             | MEG-PMG-PNH     | MEG             | MEG-PMG-PNH       | MEG-PMG          | MEG-PMG         | MEG-PMG         | MEG-PMG         | MEG-PMG                     | MEG                      | MEG-autism      | MEG-PMG-PNH     |
| <b>Birth OFC – SD</b>              | +2 SD           | MEG             | ND              | +2.5            | +2.7            | ND                | MEG, ND          | +4              | +2.5            | ND              | +2                          | ND                       | +2.7            | Congenital MEG  |
| <b>Last OFC – SD (age)</b>         | -2 SD           | MEG             | +5 SD (8y)      | +6 SD (21m)     | +6.8            | Postnatal MEG, ND | +4 (3y)          | + 5.5 (9m)      | +6.2            | +1-2 (6y)       | +5 (7m)                     | +7-8 (6y)                | +6              | +2.5 (8y8m)     |
| <b>Digital anomalies</b>           | -               | -               | -               | -               | -               | -                 | Mild 2-3 toe SYN | -               | -               | -               | Partial SYN toes 3-4 (R, L) | Prominent fingertip pads | -               | -               |
| <b>Vascular anomalies</b>          | +               | +               | -               | -               | +               | -                 | +                | -               | +               | -               | -                           | -                        | +               | +               |
| <b>Connective tissue anomalies</b> | -               | +               | -               | -               | -               | +                 | +                | -               | -               | -               | -                           | -                        | +               | -               |
| <b>Epilepsy</b>                    | +               | +               | -               | +               | -               | ND                | +                | -               | -*              | +               | +                           | -                        | +               | +               |
| <b>Epilepsy onset</b>              | 1h              | Neonatal        | -               | 4w              | -               | ND                | 14m              | -               | -               | 1y2m            | ND                          | -                        | 10h             | 13m             |
| <b>Epilepsy severity</b>           | Intractable     | Intractable     | -               | Responsive to   | -               | ND                | Multi drug       | -               | -               | ND              | ND                          | -                        | -               | -               |

|                           |        |                  |                                           |                          |                                          |                                     |                    |                                        |                |                                |                       |                               |                                                         |                                         |
|---------------------------|--------|------------------|-------------------------------------------|--------------------------|------------------------------------------|-------------------------------------|--------------------|----------------------------------------|----------------|--------------------------------|-----------------------|-------------------------------|---------------------------------------------------------|-----------------------------------------|
|                           |        |                  |                                           | AED                      |                                          |                                     | resistant epilepsy |                                        |                |                                |                       |                               |                                                         |                                         |
| <b>Ketogenic diet</b>     | -      | +                | -                                         | -                        | -                                        | ND                                  | -                  | -                                      | -              | ND                             | ND                    | -                             | -                                                       | -                                       |
| <b>Hypoglycemia</b>       | -      | +                | -                                         | -                        | -                                        | ND                                  | +                  | -                                      | -              | ND                             | ND                    | -                             | +                                                       | -                                       |
| <b>Temperature issues</b> | -      | ++               | -                                         | Episodes of hyperthermia | -                                        | ND                                  | -                  | -                                      | -              | ND                             | -                     | -                             | Excessive sweating                                      | -                                       |
| <b>DD/ID</b>              | NA     | NA               | Moderate-severe, non-verbal               | Severe                   | Gross motor DD, later development normal | ND                                  | Mild               | Severe early delays, poor head control | Mild-moderate  | Motor delays                   | Mild-moderate         | Mild motor delays, mild ID/LD | Mild DD                                                 | Severe GDD, no speech, wheelchair bound |
| <b>Autistic features</b>  | NA     | NA               | +                                         | NA                       | -                                        | ND                                  | +                  | NA                                     | -              | ND                             | -                     | -                             | ASD noted at 24-39m, - occasional self-harming behavior | -                                       |
| <b>Tone</b>               | Normal | Severe hypotonia | Infantile hypotonia (improved), hypotonia | Severe hypotonia         | Hypotonia                                | Severe hypotonia, poor head control | L hemidystonia     | Severe hypotonia                       | Mild hypotonia | Hypotonia, floppy as an infant | Generalized hypotonia | Normal                        | Generalized hypotonia                                   | Generalized hypotonia                   |

|                                                                                                                                                                                                                                                                                                                                                                                                               |                                                        |                                        |          |       |       |                                             |                                    |       |       |       |                      |       |                                                     |        |
|---------------------------------------------------------------------------------------------------------------------------------------------------------------------------------------------------------------------------------------------------------------------------------------------------------------------------------------------------------------------------------------------------------------|--------------------------------------------------------|----------------------------------------|----------|-------|-------|---------------------------------------------|------------------------------------|-------|-------|-------|----------------------|-------|-----------------------------------------------------|--------|
|                                                                                                                                                                                                                                                                                                                                                                                                               |                                                        |                                        | c facies |       |       |                                             |                                    |       |       |       |                      |       |                                                     |        |
| <b>Feeding issues</b>                                                                                                                                                                                                                                                                                                                                                                                         | NG-tube fed for 50% of feeds                           | Breast fed initially, then NG tube fed | +        | -     | -     | +                                           | Initial difficulties with dystonia | ++    | -     | ND    | Chewing difficulties | -     | +, Related to hypo-/hyperglycaemia, controlled diet | G-tube |
| <b>Course</b>                                                                                                                                                                                                                                                                                                                                                                                                 | Intractable epilepsy, s/p hemispherectomy at 2w of age | Deceased at 10m 4d                     | Alive    | Alive | Alive | Deceased, early childhood, due to pneumonia | Alive                              | Alive | Alive | Alive | Alive                | Alive | Alive                                               | Alive  |
| <p><b>Abbreviations:</b> ASD, autism spectrum disorder; DD, developmental delay; DMEG, dysplastic megalencephaly; F, female; h, hour; ID, intellectual disability; LD, learning disability; M, male; m, month; MEG, megalencephaly; NA, not applicable; ND, no data; NG, nasogastric; PMG, polymicrogyria; PNH, periventricular nodular heterotopia; SYN, syndactyly; TC, tonic-clonic seizures; y, year.</p> |                                                        |                                        |          |       |       |                                             |                                    |       |       |       |                      |       |                                                     |        |

**Supplementary Table 3. Summary of the neuroimaging features of *AKT3* mutation positive patients identified to date (N=25)**

| Subject ID                                                               | Amino acid change | Domain | Type           | MEG | MCD              | Symmetry | VMEG HYD                    | CC               | CBL/PF      | Other MRI findings       | Diagnosis       |
|--------------------------------------------------------------------------|-------------------|--------|----------------|-----|------------------|----------|-----------------------------|------------------|-------------|--------------------------|-----------------|
| <b>Mosaic <i>AKT3</i> mutations (N=5)</b>                                |                   |        |                |     |                  |          |                             |                  |             |                          |                 |
| LR15-262                                                                 | p.E17K            | PH     | Mosaic         | +   | FCD2             | L>>R     | -                           | Thin, dysplastic | -           | -                        | DMEG/HMEG       |
| HME-1565<br>(Lee et al., 2012)                                           | p.E17K            | PH     | Mosaic         | +   | FCD2             | L>>R     | VMEG, dysplastic ventricles | ND               | ND          | -                        | DMEG/HMEG       |
| Patient 3(Poduri et al., 2012)                                           | p.E17K            | PH     | Mosaic         | +   | FCD2             | R>>L     | -                           | ND               | -           | -                        | DMEG/HMEG       |
| LR11-443(Jansen et al., 2015)                                            | p.E17K            | PH     | Mosaic         | +   | FCD2             | L>>R     | VMEG                        | Thin, short      | CBLH (mild) | Mild CBLH, increased XAX | DMEG/HMEG       |
| LR16-251                                                                 | p.E17K            | PH     | Mosaic         | +   | FCD (multifocal) | R=L      | -                           | Thick            | -           | -                        | DMEG/multifocal |
| <b>Constitutional <i>AKT3</i> mutations (by functional domain; N=20)</b> |                   |        |                |     |                  |          |                             |                  |             |                          |                 |
| Patient(Takagi et al., 2017)                                             | p.E40L            | PH     | Constitutional | +   | -                | R=L      | VMEG (mild)                 | -                | -           | -                        | MEG             |
| LR16-372                                                                 | p.N53L            | PH     | Constitutional | +   | -                | R=L      | -                           | Mildly thick     | -           | -                        | MEG             |
| LR16-301                                                                 | p.F54Y            | PH     | Constitutional | +   | Diffuse PMG-PNH  | R=L      | +++                         | Thick, stretched | -           | CSPV                     | MEG-PMG-PNH     |
| LR17-245                                                                 | p.W79C            | PH     | Constitutional | +   | -                | R=L      | VMEG (mild)                 | -                | -           | -                        | MEG             |
| LP96-103                                                                 | p.V183D           | Kinase | Constitutional | +   | PMG (BPP)-PNH    | R=L      | VMEG (mod)                  | ND               | -           | CSPV, thin WM            | MEG-PMG-PNH     |

|                                  |         |        |                         |   |                  |      |                 |                          |                           |                           |             |
|----------------------------------|---------|--------|-------------------------|---|------------------|------|-----------------|--------------------------|---------------------------|---------------------------|-------------|
| LR12-314(Nellist et al., 2015)   | p.V183D | Kinase | Constitutional          | + | PMG (BPP)-PNH    | R=L  | VMEG (mild)     | -                        | Mild CBTE                 | -                         | MEG-PMG-PNH |
| LR11-354(Riviere et al., 2012)   | p.N229S | Kinase | Constitutional          | + | PMG (BPP)        | R=L  | VMEG            | Thick                    | Mild CBTE                 | -                         | MEG-PMG     |
| Patient(Harada et al., 2015)     | p.N229S | Kinase | Presumed constitutional | + | PMG (BPP)        | R=L  | VMEG            | ND                       | -                         | CSPV                      | MEG-PMG     |
| Patient 2(Nakamura et al., 2014) | p.N229S | Kinase | Constitutional          | + | Diffuse PMG      | L>>R | -               | -                        | -                         | ND                        | MEG-PMG     |
| Patient 1 (Negishi et al., 2014) | p.N229S | Kinase | Constitutional          | + | PMG (BPP)        | R=L  | VMEG            | ND                       | ND                        | -                         | MEG-PMG     |
| LR13-041                         | p.V268A | Kinase | Presumed constitutional | + | Focal PMG (R PS) | L>R  | VMEG (mod)      | Mildly thick             | Large CBL with mild CBTE  | CSPV                      | MEG-PMG     |
| LR14-271                         | p.D322N | Kinase | Constitutional          | + | Focal PMG (L PS) | R=L  | -               | Mildly thick, dysplastic |                           | -                         | MEG-PMG     |
| LR14-254                         | p.D322N | Kinase | Constitutional          | + | Focal PMG (R PS) | R=L  | HYD (s/p shunt) | Thick                    | CBTE s/p PF decompression |                           | MEG-PMG     |
| LR12-412                         | p.R465W | C-ter  | Constitutional          | + | PMG (BPP)        | R=L  | -               | Thick                    |                           | Mild lumbar dural ectasia | MEG-PMG     |
| LR14-025                         | p.R465W | C-ter  | Constitutional          | + | Diffuse PMG      | R=L  | VMEG (mod)      | Thick                    | Large CBL                 | CSPV, increased           | MEG-PMG     |

|                                |         |       |                         |   |                      |     |                   |                           |   |                                               |             |
|--------------------------------|---------|-------|-------------------------|---|----------------------|-----|-------------------|---------------------------|---|-----------------------------------------------|-------------|
|                                |         |       |                         |   |                      |     |                   |                           |   | XAX                                           |             |
| LR12-470                       | p.R465W | C-ter | Presumed constitutional | + | Subtle dysgyria R PS | R=L | -                 | Mildly thick              | - | -                                             | MEG-autism  |
| LR13-008                       | p.R465W | C-ter | Presumed constitutional | + | -                    | R=L | VMEG (mild)       | Dysplastic, thin splenium | - | Encephaloma lacia and gliosis R insular gyrus | MEG-autism  |
| LR14-112                       | p.R465W | C-ter | Constitutional          | + | BPP-PVNH             | R=L | VMEG (mod-severe) | Mildly thick              | - | -                                             | MEG-PMG-PNH |
| LR08-018(Riviere et al., 2012) | p.R465W | C-ter | Constitutional          | + | PMG (BPP)            | R=L | VMEG (mild)       | -                         | - | CSPV                                          | MEG-PMG     |
| PMG-3801(Jamuar et al., 2014)  | p.R465W | C-ter | Constitutional          | + | PMG                  | ND  | ND                | ND                        | - | ND                                            | MEG-PMG     |

**Abbreviations:** BPP, bilateral perisylvian polymicrogyria; CC, callosal abnormalities; CSPV, cavum septum pellucidum et vergae; FCD, focal cortical dysplasia; HYD, hydrocephalus; MEG, megalencephaly; MPPH, megalencephaly-polymicrogyria-polydactyly-hydrocephalus syndrome; ND, no data; PMG, polymicrogyria; PNH, periventricular nodular heterotopia; PS, perisylvian region; VMEG, ventriculomegaly; XAX, extra-axial space.



**Supplementary Table 4. Additional pertinent medical issues in patients with *AKT3* mutations**

| <b>System</b>                          | <b>Patient ID</b> | <b>Summary</b>                                                                                                                                                                                                                                                                                                                                                                                                                                                                                                                                                                                            |
|----------------------------------------|-------------------|-----------------------------------------------------------------------------------------------------------------------------------------------------------------------------------------------------------------------------------------------------------------------------------------------------------------------------------------------------------------------------------------------------------------------------------------------------------------------------------------------------------------------------------------------------------------------------------------------------------|
| <b>Endocrine problems</b>              |                   |                                                                                                                                                                                                                                                                                                                                                                                                                                                                                                                                                                                                           |
| <b>Hypoglycemia</b>                    | LR13-041          | Recurrent hypoglycemia                                                                                                                                                                                                                                                                                                                                                                                                                                                                                                                                                                                    |
|                                        | LR13-008          | Unexplained episodes of hyper- and hypo-glycaemia. Episodes occurred particularly in the morning or if diet was not monitored. The cause of these episodes remains undetermined                                                                                                                                                                                                                                                                                                                                                                                                                           |
|                                        |                   | Patient LR14-254 underwent a baseline endocrine evaluation which was negative                                                                                                                                                                                                                                                                                                                                                                                                                                                                                                                             |
| <b>Hypothyroidism</b>                  | LR14-112          | Hypothyroidism, treated with L-thyroxine                                                                                                                                                                                                                                                                                                                                                                                                                                                                                                                                                                  |
| <b>Vascular anomalies</b>              | LR15-262          | Capillary malformations                                                                                                                                                                                                                                                                                                                                                                                                                                                                                                                                                                                   |
|                                        | LR16-251          | Patches of capillary-lymphatic malformations (~3 in number)                                                                                                                                                                                                                                                                                                                                                                                                                                                                                                                                               |
|                                        | LR17-245          | Small capillary malformation on the occiput, and another one on the abdomen                                                                                                                                                                                                                                                                                                                                                                                                                                                                                                                               |
|                                        | LR13-041          | Facial nevus flammeus and prominent veins over the abdomen                                                                                                                                                                                                                                                                                                                                                                                                                                                                                                                                                |
|                                        | LR14-254          | Capillary malformations over the back, abdomen and thigh                                                                                                                                                                                                                                                                                                                                                                                                                                                                                                                                                  |
|                                        | LR13-008          | Prenatal stroke due to occlusion of the right anterior coronary artery, as well as capillary malformation over a patch of aplasia cutis of the cranium                                                                                                                                                                                                                                                                                                                                                                                                                                                    |
|                                        | LR14-112          | Patchy capillary malformations over the palms and soles bilaterally                                                                                                                                                                                                                                                                                                                                                                                                                                                                                                                                       |
| <b>Connective tissue abnormalities</b> | LP96-103          | Aplasia cutis congenita of the scalp                                                                                                                                                                                                                                                                                                                                                                                                                                                                                                                                                                      |
|                                        | LR13-008          | Aplasia cutis congenita of the scalp                                                                                                                                                                                                                                                                                                                                                                                                                                                                                                                                                                      |
|                                        | LR13-041          | Doughy skin, hypermobility                                                                                                                                                                                                                                                                                                                                                                                                                                                                                                                                                                                |
| <b>Seizures</b>                        | LR15-262          | Child born in status epilepticus requiring early surgery. EEG at age two days showed burst suppression activity, characterized by high amplitude bursts of spike and spike/slow wave discharges, primarily from the left hemisphere, with periods of suppressed activity. Runs of periodic rhythmic spike and spike /slow wave discharges, occurring out of primarily left hemispheres independently, during periods of amplitude suppression and sometimes representing electrographic seizures, suggestive of a severe diffuse state of cerebral dysfunction and significant cerebral hyperexcitability |
|                                        | LR13-041          | Focal symptomatic and tonic clonic seizures during sleep, plus astatic seizures, well-controlled on levetiracetam                                                                                                                                                                                                                                                                                                                                                                                                                                                                                         |
|                                        | LR14-025          | A few febrile convulsions with a normal EEG                                                                                                                                                                                                                                                                                                                                                                                                                                                                                                                                                               |
|                                        | LR13-008          | Focal, tonic clonic epilepsy presumed to be secondary to cerebrovascular accident, poorly controlled on trileptal                                                                                                                                                                                                                                                                                                                                                                                                                                                                                         |
|                                        | LR14-112          | Complex febrile seizures with partial secondary generalization, treated with levetiracetam, valproic acid, and phenobarbital                                                                                                                                                                                                                                                                                                                                                                                                                                                                              |

|                             |           |                                                                                                                                                                |
|-----------------------------|-----------|----------------------------------------------------------------------------------------------------------------------------------------------------------------|
|                             | LR16-251  | Treated with several AEDs                                                                                                                                      |
|                             | LR16-301  | General and focal, generalized tonic-clonic seizures, controlled on several AEDs. Seizure activity on EEG. Spasm controlled on vigabatrin and corticosteroids. |
|                             | *LR14-254 | EEG epileptic abnormalities including centro-temporal bilateral asynchronous slow waves, with activation during slow sleep during the last two years of age    |
| <b>Other medical issues</b> | LR14-271  | Failure to thrive                                                                                                                                              |
|                             | LR12-412  | Short stature                                                                                                                                                  |
|                             | LR14-025  | Excessive oral secretions, signs of supra-bulbar palsy                                                                                                         |
|                             | LR13-008  | Severe vitamin A malabsorption                                                                                                                                 |
|                             | LR14-112  | IgA and IgE deficiency with susceptibility to severe infections                                                                                                |
|                             | LR13-041  | Recurrent infections                                                                                                                                           |

**Supplementary Table 5. Molecular finding, levels of mosaicism and detection method of *AKT3* mutation positive patients identified to date (N=25).**

| Subject ID                                  | cDNA change | Amino acid change | Type                    | Alternative allele fraction (AAF)                                             | Inheritance                     | Method of detection                                |
|---------------------------------------------|-------------|-------------------|-------------------------|-------------------------------------------------------------------------------|---------------------------------|----------------------------------------------------|
| <b>Mosaic <i>AKT3</i> mutations</b>         |             |                   |                         |                                                                               |                                 |                                                    |
| LR15-262                                    | c.49G>A     | p.Glu17Lys        | Mosaic                  | 0% <sup>blood</sup> , 12.6-13.9% <sup>brain</sup> ,<br>8.6-9.5% <sup>FB</sup> | NA                              | Multiplex PCR, NGS v.1 IonTorrent                  |
| HME-1565 (Lee et al., 2012)                 | c.49G>A     | p.E17K            | Mosaic                  | ~16-30%                                                                       | <i>De novo</i>                  | PCR-restriction endonuclease enzyme assay          |
| Patient 3(Poduri et al., 2012)              | c.49G>A     | p.Glu17Lys        | Mosaic                  | 35% <sup>brain</sup><br>0% <sup>blood</sup>                                   | <i>De novo</i>                  | Sanger sequencing, topo-cloning                    |
| LR11-443(Jansen et al., 2015)               | c.49G>A     | p.Glu17Lys        | Mosaic                  | 10-18% <sup>brain</sup> , 0% <sup>dura</sup> ,<br>10/779 (1.3%) <sup>FB</sup> | <i>De novo</i>                  | MIPs, Sanger sequencing                            |
| LR16-251                                    | c.49G>A     | p.Glu17Lys        | Mosaic                  | 15/779 (1.8%) <sup>FB</sup>                                                   | NA                              | Targeted NGS                                       |
| <b>Constitutional <i>AKT3</i> mutations</b> |             |                   |                         |                                                                               |                                 |                                                    |
| Patient(Takagi et al., 2017)                | c.118G>A    | p.Glu40Lys        | Constitutional          | 56/114 (49.1%) <sup>blood</sup>                                               | <i>De novo</i>                  | WES                                                |
| LR16-372                                    | c.159C>A    | p.Asn53Leu        | Constitutional          | ~50% <sup>blood</sup>                                                         | <i>De novo</i>                  | WES (singleton, with parental Sanger confirmation) |
| LR16-301                                    | c.161T>A    | p.Phe54Tyr        | Constitutional          | ~50% <sup>blood</sup>                                                         | <i>De novo</i>                  | WES (singleton, with parental Sanger confirmation) |
| LR17-245                                    | c.237G>T    | p.Trp79Cys        | Constitutional          | 492/1023 (48%) <sup>blood</sup>                                               | <i>De novo</i>                  | Targeted NGS                                       |
| LP96-103                                    | c.548T>A    | p.Val183Asp       | Constitutional          | 291/556 (52%) <sup>blood</sup>                                                | <i>De novo</i> <sup>blood</sup> | MIPs, Sanger sequencing                            |
| LR12-314(Nellist et al., 2015)              | c.548T>A    | p.Val183Asp       | Constitutional          | 144/301 (48%) <sup>blood/FB</sup>                                             | <i>De novo</i>                  | MIPs, Sanger sequencing                            |
| LR11-354(Riviere et al., 2012)              | c.686A>G    | p.Asn229Ser       | Constitutional          | ~50% <sup>blood</sup>                                                         | <i>De novo</i> <sup>blood</sup> | Sanger sequencing                                  |
| Patient(Harada et                           | c.686A>G    | p.Asn229Ser       | Presumed constitutional | ~50% <sup>blood</sup>                                                         | <i>De novo</i>                  | Targeted NGS, Sanger sequencing                    |

|                                         |           |             |                         |                                                                   |                                            |                                   |
|-----------------------------------------|-----------|-------------|-------------------------|-------------------------------------------------------------------|--------------------------------------------|-----------------------------------|
| al., 2015;<br>Nakamura et al.,<br>2014) |           |             |                         |                                                                   |                                            |                                   |
| Patient 1<br>(Negishi et al.,<br>2014)  | p.N229S   | Kinase      | Constitutional          | ~50% <sup>blood</sup>                                             | <i>De novo</i>                             | WES                               |
| Patient<br>2(Nakamura et<br>al., 2014)  | c.686A>G  | p.Asn229Ser | Constitutional          | 52.5% <sup>blood</sup>                                            | <i>De novo</i>                             | WES                               |
| LR13-041                                | c.803T>C  | p.Val268Ala | Presumed constitutional | 158/320 (49%) <sup>blood</sup> , 10/29<br>(34%) <sup>saliva</sup> | <i>De novo</i> <sup>blood,</sup><br>saliva | MIPs, Sanger sequencing           |
| LR14-271                                | c.964G>A  | p.Asp322Asn | Constitutional          | 436/874 (50%) <sup>blood</sup>                                    | <i>De novo</i> <sup>blood</sup>            | NGS                               |
| LR14-254                                | c.964G>A  | p.Asp322Asn | Constitutional          | ~50% <sup>saliva</sup>                                            | <i>De novo</i> <sup>saliva</sup>           | NGS (Haloplex), Sanger sequencing |
| LR12-412                                | c.1393C>T | p.Arg465Trp | Constitutional          | 50% <sup>blood</sup>                                              | NA                                         | MIPs, Sanger sequencing           |
| LR14-025                                | c.1393C>T | p.Arg465Trp | Constitutional          | 50% <sup>blood</sup><br>50% <sup>saliva</sup>                     | <i>De novo</i> <sup>blood,</sup><br>saliva | MIPs, Sanger sequencing           |
| LR12-470                                | c.1393C>T | p.Arg465Trp | Presumed constitutional | 11/34 (32%) <sup>saliva</sup>                                     | <i>De novo</i> <sup>saliva</sup>           | MIPs, Sanger sequencing           |
| LR13-008                                | c.1393C>T | p.Arg465Trp | Presumed constitutional | 8/23 (35%) <sup>saliva</sup>                                      | <i>De novo</i> <sup>saliva</sup>           | MIPs, Sanger sequencing           |
| LR14-112                                | c.1393C>T | p.Arg465Trp | Constitutional          | 50% <sup>blood</sup> , 50% <sup>saliva</sup>                      | <i>De novo</i> <sup>saliva</sup>           | MIPs, Sanger sequencing           |
| LR08-<br>018(Riviere et<br>al., 2012)   | c.1393C>T | p.Arg465Trp | Constitutional          | 43% <sup>blood</sup>                                              | <i>De novo</i>                             | WES, Sanger sequencing            |
| PMG-<br>3801(Jamuar et<br>al., 2014)    | c.1393C>T | p.Arg465Trp | Constitutional          | 22/50 (44%) <sup>blood</sup>                                      | <i>De novo</i>                             | MIPs, Sanger sequencing           |

**Abbreviations:** FB, skin fibroblasts; NGS, next generation sequencing; MIPs, molecular inversion probes; WES, whole exome sequencing.

**AKT3: NM\_005465.4**

**Supplementary Table 6. Fisher’s exact test comparing the association between segmental cortical malformations and the type of *AKT3* mutation (mosaic vs. constitutional).**

| <b>Cohort</b>                                                        | <b>Segmental cortical malformations (FCD/HMEG)</b> | <b>No segmental cortical malformations</b> | <b>Total</b> |
|----------------------------------------------------------------------|----------------------------------------------------|--------------------------------------------|--------------|
| <b>Mosaic <i>AKT3</i> mutations (E17K)</b>                           | <b>5</b>                                           | <b>0</b>                                   | <b>5</b>     |
| <b>Constitutional <i>AKT3</i> mutations (all others)</b>             | <b>0</b>                                           | <b>20</b>                                  | <b>20</b>    |
| <b>Total</b>                                                         | <b>5</b>                                           | <b>20</b>                                  | <b>25</b>    |
| The two-tailed P value <0.0001 (extremely statistically significant) |                                                    |                                            |              |

Supplementary Figure

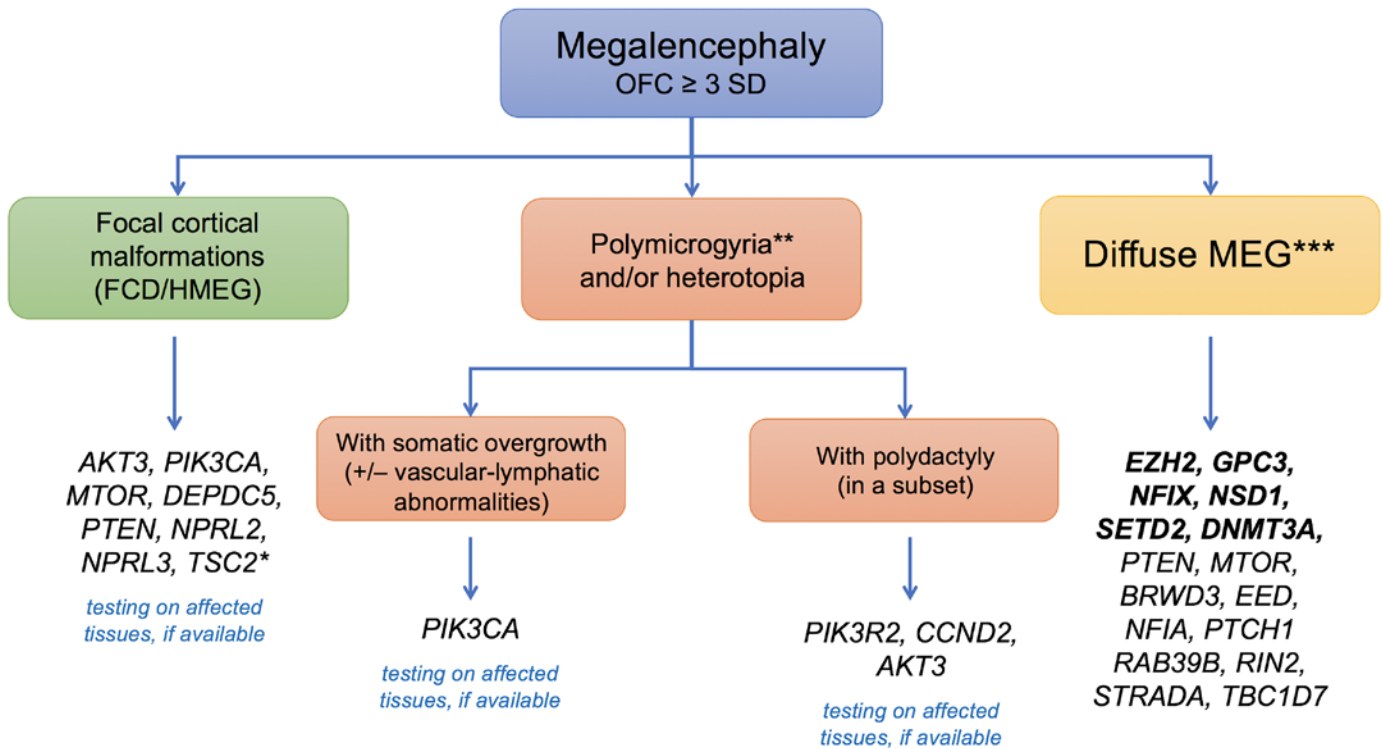

**Supplementary Figure 1. Proposed diagnostic workflow for individuals with megalencephaly (MEG).** Individuals with megalencephaly can be clinically stratified based on several features, including brain imaging abnormalities, into several groups including individuals with highly focal malformations of cortical development (such as focal cortical dysplasia, FCD, hemimegalencephaly, HMEG) caused predominantly by mosaic mutations of the PI3K-AKT-MTOR pathway (group 1); individuals with polymicrogyria (with or without heterotopia; group 2); and individuals with diffuse megalencephaly but without consistent cortical dysplasia (that is seen more commonly in groups 1 and 2).

**Notes:** \*Mutations of other PI3K-AKT-MTOR pathway genes may be associated with these disorders as well.

\*\*Polymicrogyria in this group is typically bilateral perisylvian in distribution.

\*\*\*This is a highly heterogeneous group of disorders that can also be associated with characteristic brain malformations in some individuals, in addition to a wide range of non-neurologic findings (not shown here). Several of these syndromes are also associated with somatic overgrowth (genes in **bold text**).

**Both single nucleotide changes and copy number abnormalities of these genes may be associated with these phenotypes.**

## Supplementary Text

**Cohort tested.** Seven individuals in this manuscript were identified by testing a cohort of 105 individuals with megalencephaly, hemimegalencephaly, and focal cortical dysplasia in our research laboratory at the Seattle Children's Research Institute. Individuals were tested using a targeted Next Generation Sequencing panel that includes 14 known PI3K-AKT-MTOR pathway genes, in addition to other candidate genes. Known genes on the panel include *PIK3CA*, *PIK3R2*, *AKT3*, *MTOR*, *CCND2*, *PTEN*, *TSC1*, *TSC2*, *EZH2*, *NSD1*, *DEPDC5*, *GNAQ*, *STRADA*, and *TBC1D7*. The remaining mutation-positive individuals of our cohort were identified either by clinical testing or through national and international collaborations.

### Additional pertinent medical information:

**Patient LR17-245:** This child is a 30-month-old boy identified at birth with macrocephaly. Fetal head circumference per ultrasound at 25 weeks' gestation had been noted at the 90th%ile. The pregnancy, his parents' first, had been complicated by pregnancy-induced hypertension at 39 weeks, prompting an unsuccessful induction of labor, followed by Caesarean section delivery. Birthweight was 3850 g (85th%ile), head circumference was 40.5 cm (+ 2.7 SD), and length was 53 cm (90th%ile). Parental head circumferences were 55 cm (mother) and 60.5 cm (father). A brain ultrasound just after delivery identified no abnormalities. During the first year of life, his head circumference increasingly deviated from the mean, and then stabilized at 12 months of age at + 6.5 SD (55.3 cm). At age 21 months, his head circumference was 58 cm (+7 SD). At 29 months, his head circumference was 58.5 cm (+ 6.8 SD). He has had normal neurodevelopment, except for hypotonia and gross motor delays. At age 23 months, he had mastered gross motor skill equivalency to 15 - 18 months' age. He began walking at age 18 months. Social, fine motor, and language development have been entirely normal. A brain MRI performed at 6 months of age demonstrated megalencephaly, mild ventriculomegaly (affecting the third and lateral ventricles), and mild narrowing of the foramen magnum with minimal constriction of the uppermost cervical cord. He has no swallowing or respiratory difficulties. There were no dysmorphic features. He had a typical capillary vascular birthmark of the occiput and a capillary malformation on the flank. Veins were easily visible in the scalp.

**Patient LR16-301:** This child had severe hypotonia at birth. Seizures first occurred at 4 weeks of age. Infantile spasms (ISS) occurred at 3 months of age. During the first year of life, this child was noted to have many episodes of discomfort with crying and arching of the back. She also had episodes of suspected high intracranial pressure (ICP). Furthermore, this child had episodes of hyperthermia of unexplained etiology. The first episode lasted 4 weeks and was partially responsive to Propranolol. This child has global developmental delays. She is non-verbal. She recognizes family members and is fond of patterns and music. She eats a general diet by mouth and has been growing well. The episodes of discomfort have decreased dramatically during the second year of life.

**Patient LR14-025:** This child walked at 20 months of life. He has delayed speech and is non-verbal at 20 months of age.

**Patient LR12-470:** This girl has mild/borderline intellectual disability with communicative disability that did not meet classic criteria for Autism Spectrum Disorder (ASD). She also has significant behavioral issues with temper tantrums and sleep difficulties as well.

**Patient LR13-008:** This child walked at approximately 18 months of age. He had no speech development. Cognitive assessments around 5 years of age identified his cognitive level to be 18 months of age. His eye contact deteriorated around 2.5 years of age and he was formally diagnosed with Autism Spectrum Disorder (ASD).

**Patient LR16-251:** This child passed away due to complications from chronic intractable epilepsy. At 10 months of age, he had progressive feeding intolerance requiring a reduction in his feeding volumes.

**Patient LR14-254:** Psychomotor delays. At 24 months, His Griffiths Mental Development scale (GQ) was 62. At 6 years of age, his WPPSI-III scores were as follows: QIT= 92, QIV=94, QIP=100.

**Patient LR08-018:** This boy was born at 38 weeks of gestation because of maternal hypertension. Delivery was by Cesarean section because of failure-to-progress. His birth weight was 8 pounds, 3 ounces, and his OFC was 38.5 cm (+2.5 standard deviations, SD). His Apgar scores were 9 and 9. He was followed closely after discharge because of his large head size and found to have a mildly weak suck, hypotonia, and subtle right-sided tremors that were not associated with epileptic discharges on EEG. Brain imaging studies - serial ultrasound, head CT and brain MRI - showed large brain, enlarged but asymmetric ventricles and a cortical malformation that appeared more extensive on the left side. A small vascular malformation was seen beneath his umbilicus.

By age 3 months, he had intermittent stridor, gastroesophageal reflux, constipation, and rapidly enlarging head size. Throughout his first years of life, his head grew rapidly with his OFC measured at +4 SD by 3 months, +5 SD by 5 months, and +6 SD by 11 months of age. Serial brain imaging studies revealed hydrocephalus and mild cerebellar tonsils herniation (not quite Chiari malformation) and a shunt was placed at 11 months of age. His parents thought that his development improved after the shunt.

Examination showed a markedly enlarged head with prominent forehead and prominent small veins over his forehead, mildly deep-set eyes, wide and prominent forehead, prominent fleshy soft tissues of his face, high-arched palate, everted lower lip and prominent dimple. His skin felt soft and doughy suggesting a subtle connective tissue dysplasia. He had mildly diminished movements and increased tone on his right side.

By age 3 years, he had made some developmental progress. He had had two short seizures. He was non-verbal but could use communicate by touching pictures on a computer screen. By 4 years, he could walk, use about 20 single words, and follow simple commands. He also had onset of seizures that became progressively more frequent and severe. These included series of myoclonic jerks lasting up to 30 minutes, asymmetric generalized tonic-clonic seizures that were more severe on his right side and lasted 1-5 minutes, and a few episodes of unresponsiveness lasting 5-8 minutes. Most occurred in the morning soon after waking, often with an aura as he would walk toward his parents just before they began. Trials of multiple seizure medications had little effect, but the ketogenic diet reduced seizure frequency to 1-2 per week.

In the weeks before his death, his seizure frequency had increased but he was otherwise healthy. On the day before his death he went to sleep at his usual time and was seen breathing normally in the late evening. His parents found him unresponsive and not breathing but still warm early the following morning, and he could not be resuscitated. While the terminal event was not witnessed, his history of intractable epilepsy and recent increase in seizures suggest sudden unexpected death in epilepsy (SUDEP).

His growth measurements throughout life were the following:

| Age        | Size (cm) | Size (SD) |
|------------|-----------|-----------|
| Birth      | 38.5 cm   | +1.63     |
| 2.5 months | 46 cm     | +4.2      |



|           |      |       |
|-----------|------|-------|
| 4 months  | 47.5 | +4.5  |
| 5 months  | 49.5 | +5.25 |
| 11 months | 54   | +6    |

## References

- Harada, A., et al., 2015. Sudden death in a case of megalencephaly capillary malformation associated with a de novo mutation in AKT3. *Childs Nerv Syst.* 31, 465-71.
- Jamuar, S.S., et al., 2014. Somatic mutations in cerebral cortical malformations. *N Engl J Med.* 371, 733-43.
- Jansen, L.A., et al., 2015. PI3K/AKT pathway mutations cause a spectrum of brain malformations from megalencephaly to focal cortical dysplasia. *Brain.* 138, 1613-28.
- Nakamura, K., et al., 2014. AKT3 and PIK3R2 mutations in two patients with megalencephaly-related syndromes: MCAP and MPPH. *Clin Genet.* 85, 396-8.
- Nellist, M., et al., 2015. Germline activating AKT3 mutation associated with megalencephaly, polymicrogyria, epilepsy and hypoglycemia. *Mol Genet Metab.* 114, 467-73.
- Poduri, A., et al., 2012. Somatic activation of AKT3 causes hemispheric developmental brain malformations. *Neuron.* 74, 41-8.
- Riviere, J.B., et al., 2012. De novo germline and postzygotic mutations in AKT3, PIK3R2 and PIK3CA cause a spectrum of related megalencephaly syndromes. *Nat Genet.* 44, 934-40.
- Takagi, M., et al., 2017. A novel de novo germline mutation Glu40Lys in AKT3 causes megalencephaly with growth hormone deficiency. *Am J Med Genet A.*
